# Supplementary material
Source: HighWire-hosted journal article supplement (http://www.cmaj.ca/highwire/filestream/59063/field_highwire_adjunct_files/0/size-behrens-1-at.pdf)
Supplement: size-behrens-1-at.pdf [file size-behrens-1-at.pdf]

**Appendix 1 (as supplied by the authors):** Baseline characteristics presented for the analytic cohort and the entire cohort, NIH-AARP Diet and Health Study, 1995/1996.

|                                                                         | Analytic cohort <sup>a</sup> | Entire cohort |
|-------------------------------------------------------------------------|------------------------------|---------------|
| Subjects                                                                |                              |               |
| N                                                                       | 113,279                      | 566,398       |
| Age in 1995/1996 (yrs), mean                                            | 62                           | 62            |
| Sex, percent                                                            |                              |               |
| Women                                                                   | 42                           | 40            |
| Men                                                                     | 58                           | 60            |
| Postgraduate education, percent                                         |                              |               |
| No                                                                      | 74                           | 81            |
| Yes                                                                     | 26                           | 19            |
| Ethnicity, percent                                                      |                              |               |
| White                                                                   | 95                           | 93            |
| Non-White                                                               | 5                            | 7             |
| Frequency of vigorous physical activity (times/week), mean <sup>b</sup> | 2.6                          | 2.4           |
| BMI (kg/m <sup>2</sup> ), mean                                          | 26.2                         | 27.1          |
| Smoking status, percent                                                 |                              |               |
| Never smoker                                                            | 42                           | 35            |
| Distant past smoker <sup>c</sup>                                        | 39                           | 40            |
| Recent past smoker <sup>d</sup>                                         | 10                           | 13            |
| Current smoker                                                          | 9                            | 12            |

<sup>a</sup> The analytic cohort excluded participants with a history of COPD, cancer, or heart disease. Because those diseases are positively associated with adiposity, current smoking, and low socio-economic status, the analytic cohort had an anticipated slightly lower average BMI and a greater proportion of never smokers and postgraduates than the overall cohort.

<sup>b</sup> Vigorous physical activity was defined as 20 minutes or more of exercise that was sufficient to increase breathing, increase heart rate, or work up a sweat. Adherence to vigorous physical activity recommendations was defined as engaging in vigorous physical activity three or more times per week.

<sup>c</sup> Distant past smokers were defined as those who quit smoking  $\geq 10$  years ago.

<sup>d</sup> Recent past smokers were defined as those who quit smoking  $< 10$  years ago.
